# Supplementary material for: Abundant and Rare Microbial Biospheres Respond Differently to Environmental and Spatial Factors in Tibetan Hot Springs
Source: PubMed Central journal article supplement (PMC6156277; doi:10.3389/fmicb.2018.02096), 2018-09-19

Table S1. Geographic and geochemical parameters of the studied hot springs on the Tibetan Plateau

| Sampling Zone | Sample ID | Latitude  | Longitude | Elevation (meters about sea level) | Temp. (°C) | pH   | DOC (mg/L) | TOC (%) | F (mg/L) | Cl (mg/L) | SO4 (mg/L) | Br (mg/L) | Na (mg/L) | K (mg/L) | Mg (mg/L) | Ca (mg/L) | Salinity (g/L) | Fe2 (mg/L) |
|---------------|-----------|-----------|-----------|------------------------------------|------------|------|------------|---------|----------|-----------|------------|-----------|-----------|----------|-----------|-----------|----------------|------------|
| QZM zone      | QZM_1     | 28°14'47" | 91°47'44" | 4387                               | 86.0       | 7.5  | 41.5       | 0.4     | 2.9      | 383.4     | 362.7      | 1.4       | 263.1     | 47.6     | 19.8      | 239.5     | 1.3            | 0.7        |
|               | QZM_2     | 28°14'47" | 91°47'44" | 4388                               | 82.5       | 7.5  | 43.8       | 1.4     | 0.0      | 401.7     | 348.2      | 15.7      | 406.4     | 46.4     | 60.4      | 230.9     | 1.5            | 0.3        |
|               | QZM_3     | 28°14'47" | 91°47'44" | 4388                               | 63.0       | 6.8  | 45.3       | 12.6    | 1.6      | 312.3     | 338.8      | 15.4      | 274.7     | 46.5     | 22.5      | 315.9     | 1.3            | 0.6        |
|               | QZM_4     | 28°14'55" | 91°48'13" | 4450                               | 62.0       | 6.5  | 30.3       | 1.4     | 77.6     | 277.7     | 291.2      | 0.0       | 291.2     | 47.9     | 38.3      | 316.1     | 1.3            | 0.1        |
|               | QZM_5     | 28°14'55" | 91°48'14" | 4450                               | 56.0       | 6.8  | 50.6       | 1.3     | 170.0    | 273.7     | 284.0      | 11.7      | 284.0     | 60.1     | 48.3      | 536.5     | 1.5            | 0.3        |
|               | QZM_6     | 28°14'55" | 91°48'14" | 4450                               | 54.0       | 7.0  | 27.0       | 3.5     | 65.8     | 282.1     | 297.2      | 0.0       | 297.2     | 63.5     | 47.7      | 431.8     | 1.4            | 0.3        |
|               | QZM_7     | 28°14'55" | 91°48'14" | 4450                               | 52.0       | 6.8  | 28.0       | 8.4     | 1.4      | 285.9     | 292.4      | 12.1      | 292.4     | 65.9     | 38.1      | 143.0     | 1.1            | 0.2        |
|               | QZM_9     | 28°14'53" | 91°48'31" | 4505                               | 67.0       | 7.0  | 36.7       | 1.3     | 0.1      | 212.5     | 461.2      | 0.0       | 187.9     | 21.2     | 33.7      | 264.6     | 1.2            | 0.9        |
|               | QZM_10    | 28°14'53" | 91°48'31" | 4505                               | 65.0       | 7.0  | 33.6       | 2.0     | 0.3      | 128.6     | 252.7      | 0.0       | 128.3     | 17.5     | 18.4      | 138.3     | 0.7            | 0.6        |
|               | QZM_11    | 28°14'53" | 91°48'31" | 4505                               | 64.0       | 6.8  | 20.6       | 0.0     | 0.0      | 214.2     | 417.9      | 0.0       | 202.1     | 24.5     | 39.6      | 328.0     | 1.2            | 0.6        |
|               | QZM_12    | 28°14'53" | 91°48'31" | 4505                               | 62.0       | 6.8  | 48.8       | 1.2     | 0.0      | 208.8     | 381.5      | 0.0       | 210.3     | 30.5     | 30.9      | 252.9     | 1.1            | 0.5        |
|               | QZM_13    | 28°14'55" | 91°48'12" | 4438                               | 65.7       | 6.7  | 958.6      | 1.0     | 0.0      | 208.4     | 350.2      | 0.0       | 162.0     | 19.8     | 26.6      | 188.9     | 1.0            | 0.3        |
|               | QZM_14    | 28°15'50" | 91°48'35" | 4502                               | 67.5       | 6.5  | 111.6      | 0.9     | 0.8      | 412.8     | 354.7      | 14.5      | 346.7     | 47.6     | 27.4      | 231.7     | 1.4            | 2.4        |
|               | QZM_15    | 28°14'47" | 91°47'44" | 4388                               | 78.0       | 7.0  | 26.6       | 0.9     | 0.2      | 188.7     | 467.8      | 0.0       | 199.3     | 25.6     | 34.9      | 316.8     | 1.2            | 0.2        |
|               | QZM_16    | 28°14'47" | 91°47'44" | 4388                               | 82.0       | 6.8  | 15.6       | 12.5    | 0.0      | 105.9     | 254.4      | 0.0       | 112.6     | 23.8     | 39.8      | 259.1     | 0.8            | 0.4        |
|               | QZM_17    | 28°14'50" | 91°48'35" | 4502                               | 64.6       | 6.5  | 3.5        | 0.7     | 1.9      | 209.0     | 345.4      | 1.8       | 170.3     | 32.7     | 21.6      | 264.2     | 1.0            | 2.6        |
|               | QZM_18    | 28°14'54" | 91°48'32" | 4499                               | 62.9       | 7.0  | 7.8        | 1.8     | 2.2      | 208.4     | 383.6      | 1.0       | 181.8     | 35.5     | 21.6      | 246.7     | 1.1            | 1.2        |
|               | QZM_19    | 28°14'54" | 91°48'17" | 4448                               | 56.9       | 7.0  | 8.1        | 3.8     | 2.4      | 173.5     | 429.6      | 1.0       | 195.2     | 33.6     | 26.1      | 236.3     | 1.1            | 0.1        |
|               | QZM_20    | 28°14'56" | 91°48'14" | 4450                               | 76.9       | 7.0  | 3.9        | 9.9     | 2.5      | 245.1     | 439.4      | 1.1       | 237.8     | 36.4     | 21.7      | 295.6     | 1.3            | 0.8        |
|               | QZM_21    | 28°14'55" | 91°48'13" | 4450                               | 63.0       | 7.0  | 3.6        | 1.1     | 2.9      | 255.7     | 438.5      | 1.1       | 228.4     | 39.5     | 20.8      | 219.1     | 1.2            | 0.0        |
|               | QZM_22    | 28°14'55" | 91°48'12" | 4438                               | 60.3       | 7.0  | 2.7        | 2.2     | 2.8      | 278.4     | 435.8      | 1.2       | 239.3     | 38.4     | 22.0      | 285.8     | 1.3            | 0.1        |
|               | QZM_23    | 28°14'47" | 91°47'44" | 4387                               | 66.0       | 6.5  | 7.0        | 0.8     | 2.9      | 383.4     | 362.7      | 1.4       | 263.1     | 47.6     | 19.8      | 239.5     | 1.3            | 0.4        |
|               | QZM_24    | 28°14'47" | 91°47'44" | 4388                               | 74.9       | 7.5  | 8.8        | 10.2    | 2.8      | 385.2     | 362.2      | 1.4       | 285.9     | 50.0     | 20.1      | 290.8     | 1.4            | 0.3        |
|               | DGJ zone  | DGJ_1     | 29°36'50" | 85°44'54"                          | 5067       | 82.0 | 8.0        | 90.5    | 0.9      | 20.1      | 156.8      | 83.5      | 15.9      | 658.7    | 55.9      | 11.3      | 51.3           | 1.0        |
| DGJ_2         |           | 29°36'54" | 85°45'03" | 5070                               | 72.9       | 7.5  | 293.1      | 0.2     | 10.8     | 156.4     | 113.3      | 10.9      | 504.5     | 31.0     | 6.0       | 37.2      | 0.9            | 0.0        |
| DGJ_3         |           | 29°36'55" | 85°45'03" | 5070                               | 60.0       | 7.4  | 51.8       | 0.2     | 9.5      | 147.8     | 82.0       | 10.4      | 572.9     | 44.7     | 4.9       | 26.6      | 0.9            | 0.0        |
| DGJ_4         |           | 29°36'55" | 85°45'03" | 5070                               | 45.5       | 7.5  | 60.7       | 0.6     | 81.9     | 155.9     | 76.5       | 9.9       | 772.3     | 74.1     | 5.1       | 49.7      | 1.1            | 0.0        |
| DGJ_5         |           | 29°36'55" | 85°45'03" | 5070                               | 32.2       | 7.4  | 30.9       | 0.5     | 133.5    | 167.9     | 47.9       | 9.6       | 1055.8    | 126.1    | 8.9       | 91.9      | 1.5            | 0.0        |
| DGJ_6         |           | 29°36'14" | 85°44'50" | 5076                               | 78.5       | 8.0  | 20.7       | 0.1     | 23.1     | 162.5     | 109.4      | 10.5      | 492.4     | 30.6     | 3.2       | 12.6      | 0.8            | 0.0        |
| DGJ_8         |           | 29°36'14" | 85°44'49" | 5079                               | 80.2       | 9.5  | 28.0       | 0.1     | 22.2     | 159.8     | 84.2       | 10.1      | 518.4     | 31.0     | 3.4       | 13.3      | 0.8            | 0.0        |
| DGJ_9         |           | 29°36'14" | 85°44'49" | 5079                               | 70.0       | 9.5  | 24.2       | 0.0     | 23.2     | 162.1     | 82.9       | 10.2      | 512.7     | 34.4     | 3.3       | 14.2      | 0.8            | 0.0        |
| DGJ_10        |           | 29°36'14" | 85°44'49" | 5079                               | 60.4       | 9.0  | 34.6       | 0.7     | 20.7     | 164.0     | 88.0       | 10.9      | 799.9     | 67.8     | 3.4       | 23.5      | 1.2            | 0.0        |
| DGJ_11        |           | 29°36'14" | 85°44'49" | 5079                               | 45.0       | 8.8  | 9.7        | 0.2     | 46.0     | 161.2     | 84.2       | 10.1      | 583.0     | 56.1     | 3.4       | 15.5      | 0.9            | 0.0        |
| DGJ_12        |           | 29°36'17" | 85°44'49" | 5082                               | 81.5       | 8.0  | 27.2       | 0.3     | 20.3     | 168.2     | 89.8       | 10.1      | 493.9     | 28.3     | 3.5       | 17.2      | 0.8            | 0.0        |
| DGJ_13        |           | 29°36'17" | 85°44'49" | 5082                               | 66.0       | 7.8  | 14.6       | 0.3     | 18.1     | 166.0     | 84.8       | 10.2      | 505.7     | 30.7     | 3.1       | 55.7      | 0.9            | 0.0        |
| DGJ_14        |           | 29°36'17" | 85°44'49" | 5082                               | 50.0       | 8.0  | 7.8        | 1.2     | 59.7     | 156.2     | 8.4        | 0.0       | 659.3     | 70.7     | 3.6       | 20.4      | 0.9            | 0.2        |
| DGJ_15        |           | 29°36'17" | 85°44'49" | 5082                               | 42.5       | 8.0  | 13.2       | 2.3     | 30.2     | 141.7     | 72.4       | 0.0       | 510.8     | 65.3     | 3.8       | 14.6      | 0.8            | 0.0        |
| DGJ_16        |           | 29°36'17" | 85°44'49" | 5082                               | 35.0       | 7.8  | 9.7        | 2.3     | 69.5     | 160.1     | 62.4       | 9.5       | 817.7     | 89.9     | 3.5       | 21.9      | 1.2            | 0.0        |
| DGJ_17        |           | 29°36'11" | 85°44'52" | 5084                               | 36.7       | 3.0  | 0.0        | 0.7     | 0.4      | 1.7       | 104.7      | 0.0       | 6.3       | 3.7      | 0.9       | 9.6       | 0.1            | 2.0        |

| Sampling Zone | Sample ID | Latitude  | Longitude | Elevation (meters about sea level) | Temp. (°C) | pH  | DOC (mg/L) | TOC (%) | F (mg/L) | Cl (mg/L) | SO4 (mg/L) | Br (mg/L) | Na (mg/L) | K (mg/L) | Mg (mg/L) | Ca (mg/L) | Salinity (g/L) | Fe2 (mg/L) |
|---------------|-----------|-----------|-----------|------------------------------------|------------|-----|------------|---------|----------|-----------|------------|-----------|-----------|----------|-----------|-----------|----------------|------------|
|               | DGJ_18    | 29°36'10" | 85°44'51" | 5075                               | 69.1       | 4.5 | 2.3        | 0.3     | 0.2      | 1.3       | 144.9      | 0.0       | 8.4       | 2.4      | 1.3       | 20.2      | 0.2            | 0.1        |
|               | DGJ_19    | 29°36'14" | 85°44'50" | 5076                               | 78.9       | 8.3 | 1.5        | 0.0     | 26.3     | 162.3     | 90.1       | 0.9       | 482.4     | 56.9     | 0.7       | 33.9      | 0.8            | 0.2        |
|               | DGJ_20    | 29°36'14" | 85°44'49" | 5079                               | 74.1       | 7.0 | 3.4        | 0.0     | 24.7     | 152.0     | 87.0       | 0.8       | 432.3     | 53.7     | 0.9       | 26.0      | 0.8            | 0.1        |
|               | DGJ_21    | 29°36'14" | 85°44'49" | 5073                               | 82.1       | 7.0 | 3.4        | 0.0     | 24.1     | 148.7     | 88.0       | 0.9       | 451.2     | 53.0     | 0.8       | 23.5      | 0.8            | 0.2        |
|               | DGJ_22    | 29°36'17" | 85°44'49" | 5082                               | 75.5       | 6.9 | 3.3        | 0.3     | 24.8     | 155.3     | 84.8       | 0.9       | 436.5     | 51.2     | 0.3       | 7.2       | 0.7            | 0.0        |
|               | DGJ_23    | 29°36'23" | 85°44'53" | 5072                               | 41.5       | 6.9 | 5.5        | 0.1     | 26.2     | 147.9     | 76.2       | 0.8       | 411.0     | 43.9     | 0.6       | 21.1      | 0.7            | 0.1        |
|               | DGJ_24    | 29°36'23" | 85°44'47" | 5079                               | 81.9       | 7.4 | 3.6        | 1.1     | 24.9     | 153.9     | 84.3       | 0.9       | 442.8     | 54.2     | 1.3       | 34.0      | 0.8            | 0.2        |
|               | DGJ_25    | 29°36'19" | 85°44'47" | 5079                               | 71.4       | 7.8 | 3.6        | 0.1     | 25.1     | 155.3     | 85.2       | 0.9       | 461.1     | 54.7     | 0.2       | 6.0       | 0.8            | 0.0        |
|               | DGJ_26    | 29°36'19" | 85°44'47" | 5079                               | 66.7       | 7.4 | 4.2        | 0.1     | 25.5     | 157.9     | 87.0       | 1.0       | 473.1     | 56.0     | 0.2       | 4.7       | 0.8            | 0.0        |
|               | DGJ_27    | 29°36'19" | 85°44'47" | 5079                               | 62.3       | 7.3 | 3.5        | 1.6     | 25.5     | 158.5     | 87.8       | 0.9       | 430.5     | 51.8     | 0.3       | 7.6       | 0.7            | 0.1        |
|               | DGJ_28    | 29°36'23" | 85°44'50" | 5079                               | 79.9       | 7.0 | 3.2        | 1.1     | 25.8     | 159.4     | 86.6       | 0.9       | 445.5     | 52.1     | 0.4       | 15.2      | 0.8            | 0.1        |
|               | DGJ_29    | 29°36'29" | 85°44'52" | 5077                               | 77.8       | 7.0 | 3.2        | 0.0     | 21.7     | 144.8     | 77.6       | 0.8       | 407.7     | 46.0     | 0.2       | 6.1       | 0.7            | 0.0        |
|               | DGJ_30    | 29°36'6"  | 85°45'2"  | 5061                               | 80.2       | 6.0 | 4.3        | 0.9     | 18.5     | 117.9     | 65.8       | 1.1       | 309.3     | 35.9     | 0.3       | 8.6       | 0.5            | 0.1        |
| QC zone       | QC_1      | 30°39'59" | 91°35'28" | 4497                               | 74.2       | 7.1 | 4.0        | 0.9     | 3.6      | 439.2     | 17.4       | 0.9       | 331.5     | 92.9     | 9.4       | 173.9     | 1.1            | 0.4        |
|               | QC_2      | 30°39'59" | 91°35'28" | 4497                               | 67.0       | 7.5 | 5.2        | 8.1     | 3.6      | 428.8     | 17.1       | 0.9       | 305.1     | 88.0     | 8.5       | 68.0      | 0.9            | 0.1        |
|               | QC_3      | 30°39'59" | 91°35'29" | 4497                               | 61.4       | 6.9 | 4.6        | 0.1     | 3.5      | 444.2     | 17.2       | 0.9       | 333.0     | 94.7     | 9.5       | 157.8     | 1.1            | 0.4        |
|               | QC_4      | 30°40'1"  | 91°35'28" | 4500                               | 69.5       | 6.8 | 4.0        | 8.8     | 3.6      | 423.1     | 16.9       | 0.8       | 359.7     | 81.0     | 9.4       | 96.2      | 1.0            | 0.1        |
|               | QC_5      | 30°38'54" | 91°35'44" | 4495                               | 40.8       | 7.0 | 4.5        | 4.8     | 3.1      | 357.2     | 15.7       | 0.8       | 266.2     | 82.3     | 10.6      | 148.0     | 0.9            | 0.3        |
| SM zone       | SM_1      | 29°36'6"  | 86°24'17" | 4263                               | 85.9       | 7.2 | 7.8        | 0.7     | 6.9      | 172.9     | 859.8      | 1.0       | 227.6     | 45.5     | 21.1      | 308.6     | 1.6            | 0.2        |
|               | SM_2      | 29°12'56" | 86°24'17" | 4263                               | 79.5       | 7.2 | 2.2        | 0.1     | 5.4      | 132.0     | 1216.6     | 0.9       | 239.5     | 47.3     | 17.2      | 311.2     | 2.0            | 0.7        |
|               | SM_3      | 29°12'56" | 86°24'17" | 4263                               | 73.0       | 3.4 | 0.5        | 2.8     | 10.2     | 146.9     | 1365.0     | 0.8       | 198.0     | 47.4     | 19.3      | 449.0     | 2.2            | 31.6       |
|               | SM_4      | 29°12'58" | 86°24'14" | 4262                               | 84.9       | 8.5 | 5.7        | 4.8     | 19.0     | 751.8     | 29.2       | 2.3       | 945.5     | 161.8    | 1.4       | 15.8      | 1.9            | 0.2        |
| GD zone       | GD_1      | 28°31'13" | 91°52'56" | 4516                               | 70.9       | 7.0 | 3.6        | 0.2     | 9.8      | 558.1     | 168.6      | 1.8       | 0.1       | 79.6     | 0.6       | 16.9      | 0.8            | 0.0        |
|               | GD_2      | 28°31'13" | 91°52'56" | 4516                               | 61.8       | 7.0 | 4.2        | 0.2     | 9.7      | 648.0     | 164.3      | 2.0       | 0.0       | 91.1     | 4.4       | 54.7      | 1.0            | 0.1        |
|               | GD_3      | 28°31'13" | 91°52'56" | 4516                               | 53.9       | 7.5 | 3.7        | 0.5     | 9.8      | 662.1     | 168.1      | 2.0       | 0.0       | 90.3     | 4.4       | 52.6      | 1.0            | 0.1        |
|               | GD_4      | 28°31'13" | 91°52'56" | 4516                               | 45.7       | 7.5 | 3.7        | 1.2     | 9.9      | 670.7     | 171.7      | 2.1       | 0.0       | 97.1     | 4.7       | 53.5      | 1.0            | 0.1        |
|               | GD_5      | 28°31'11" | 91°52'59" | 4495                               | 78.4       | 8.0 | 4.2        | 1.7     | 10.0     | 677.3     | 173.7      | 2.1       | 0.0       | 85.9     | 4.1       | 45.4      | 1.0            | 0.1        |

Table S2. Affiliation of the identified phyla from the obtained 16S rRNA gene sequence reads of the total, abundant, intermediate and rare biospheres (highlighted with grey background means phyla common in the abundant, intermediate and rare biosphere)

| Total biosphere Phyla        | Relative abundance (%) | Phyla in abundant biosphere  | Relative abundance (%) | Phyla in intermediate biosphere | Relative Abundance (%) | Phyla in rare biosphere     | Relative abundance (%) |
|------------------------------|------------------------|------------------------------|------------------------|---------------------------------|------------------------|-----------------------------|------------------------|
| <i>Chloroflexi</i>           | 17.00                  | <i>Chloroflexi</i>           | 17.81                  | <i>Thermotogae</i>              | 5.60                   | <i>Dictyoglomi</i>          | 4.33                   |
| <i>Proteobacteria</i>        | 12.94                  | <i>Proteobacteria</i>        | 13.58                  | <i>Armatimonadetes</i>          | 4.49                   | <i>Hydrogenedentes</i>      | 4.20                   |
| <i>Deinococcus-Thermus</i>   | 10.23                  | <i>Deinococcus-Thermus</i>   | 10.73                  | <i>Thermodesulfobacteriia</i>   | 4.41                   | <i>Atribacteria</i>         | 4.05                   |
| <i>Bacteroidetes</i>         | 8.59                   | <i>Aquificae</i>             | 8.88                   | <i>Bacteroidetes</i>            | 4.41                   | <i>Hadesarchaea</i>         | 4.02                   |
| <i>Aquificae</i>             | 8.40                   | <i>Bacteroidetes</i>         | 8.62                   | <i>Ignavibacteriia</i>          | 4.12                   | <i>Aminicenantes</i>        | 3.73                   |
| <i>Firmicutes</i>            | 4.67                   | <i>Firmicutes</i>            | 4.78                   | <i>Acetothermia</i>             | 3.81                   | <i>Microgenomates</i>       | 3.55                   |
| <i>Cyanobacteria</i>         | 4.56                   | <i>Cyanobacteria</i>         | 4.66                   | <i>Chlorobi</i>                 | 3.64                   | <i>Calescamantes</i>        | 3.51                   |
| <i>Acetothermia</i>          | 4.11                   | <i>Acetothermia</i>          | 4.13                   | <i>Planctomycetes</i>           | 3.56                   | <i>Omnitrophica</i>         | 2.57                   |
| <i>Thermodesulfobacteria</i> | 2.93                   | <i>Thermodesulfobacteria</i> | 2.86                   | <i>Verrucomicrobia</i>          | 3.50                   | <i>Altiarchaeales</i>       | 2.45                   |
| <i>Thermotogae</i>           | 2.30                   | <i>Thermotogae</i>           | 2.12                   | <i>Acidobacteria</i>            | 3.32                   | <i>Chlamydiae</i>           | 2.43                   |
| <i>Crenarchaeota</i>         | 1.73                   | <i>Crenarchaeota</i>         | 1.65                   | <i>Nitrospirae</i>              | 3.23                   | <i>Crenarchaeota</i>        | 2.11                   |
| <i>Chlorobi</i>              | 1.48                   | <i>Chlorobi</i>              | 1.37                   | <i>Crenarchaeota</i>            | 3.16                   | <i>Fervidibacteria</i>      | 2.10                   |
| <i>Bathyarchaeota</i>        | 1.37                   | <i>Bathyarchaeota</i>        | 1.34                   | <i>Parcubacteria</i>            | 3.13                   | <i>Woesearchaeota(DHVE)</i> | 1.99                   |
| <i>Parcubacteria</i>         | 1.36                   | <i>Parcubacteria</i>         | 1.27                   | <i>Aquificae</i>                | 3.10                   | <i>Bathyarchaeota</i>       | 1.70                   |
| <i>Nitrospirae</i>           | 1.27                   | <i>Nitrospirae</i>           | 1.67                   | <i>Fervidibacteria</i>          | 3.06                   | <i>Lentisphaerae</i>        | 1.68                   |
| <i>Ignavibacteriia</i>       | 1.06                   | Others                       | 15.23                  | <i>Cyanobacteria</i>            | 2.72                   | <i>Actinobacteria</i>       | 1.66                   |
| <i>Fervidibacteria</i>       | 1.02                   |                              |                        | <i>Spirochaetae</i>             | 2.65                   | <i>Tenericutes</i>          | 1.65                   |
| Others                       | 14.93                  |                              |                        | <i>Firmicutes</i>               | 2.48                   | <i>Caldiserica</i>          | 1.58                   |
|                              |                        |                              |                        | <i>Thaumarchaeota</i>           | 2.46                   | <i>Verrucomicrobia</i>      | 1.55                   |
|                              |                        |                              |                        | <i>Euryarchaeota</i>            | 2.18                   | <i>Korarchaeota</i>         | 1.45                   |
|                              |                        |                              |                        | <i>Bathyarchaeota</i>           | 2.01                   | <i>Planctomycetes</i>       | 1.26                   |

| Total biosphere<br>Phyla | Relative<br>abundance (%) | Phyla in abundant<br>biosphere | Relative<br>abundance (%) | Phyla in intermediate<br>biosphere | Relative<br>Abundance(%) | Phyla in rare<br>biosphere | Relative<br>abundance (%) |
|--------------------------|---------------------------|--------------------------------|---------------------------|------------------------------------|--------------------------|----------------------------|---------------------------|
|                          |                           |                                |                           | <i>Aigarchaeota</i>                | 1.80                     | <i>Fibrobacteres</i>       | 1.20                      |
|                          |                           |                                |                           | <i>Caldiserica</i>                 | 1.55                     | <i>Chlorobi</i>            | 1.07                      |
|                          |                           |                                |                           | <i>Chloroflexi</i>                 | 1.55                     | <i>Thaumarchaeota</i>      | 1.04                      |
|                          |                           |                                |                           | <i>Actinobacteria</i>              | 1.52                     | <i>Acidobacteria</i>       | 1.01                      |
|                          |                           |                                |                           | Others                             | 22.54                    | Others                     | 42.13                     |

Table S3 Affiliation of the identified Class from the obtained 16S rRNA gene sequence reads of the total, abundant, intermediate and rare biospheres

| Total biosphere Class        | Relative abundance (%) | Abundant biosphere Class     | Relative abundance (%) | Intermediate biosphere Class | Relative abundance (%) | Rare biosphere Class                 | Relative abundance (%) |
|------------------------------|------------------------|------------------------------|------------------------|------------------------------|------------------------|--------------------------------------|------------------------|
| <i>Deinococci</i>            | 10.23                  | <i>Deinococci</i>            | 13.46                  | <i>Thermotogae</i>           | 4.74                   | <i>Acidimicrobiia</i>                | 2.28                   |
| <i>Chloroflexia</i>          | 9.78                   | <i>Chloroflexia</i>          | 12.81                  | <i>Thermodesulfobacteria</i> | 3.74                   | <i>Opitutae</i>                      | 2.20                   |
| <i>Aquificae</i>             | 8.59                   | <i>Aquificae</i>             | 11.13                  | <i>Gammaproteobacteria</i>   | 3.50                   | <i>Bacteroidetes Incertae Sedis</i>  | 2.15                   |
| <i>Betaproteobacteria</i>    | 5.40                   | <i>Betaproteobacteria</i>    | 6.92                   | <i>Ignavibacteria</i>        | 3.49                   | <i>Coriobacteriia</i>                | 2.11                   |
| <i>Sphingobacteriia</i>      | 4.77                   | <i>Sphingobacteriia</i>      | 6.06                   | <i>Solibacteres</i>          | 3.49                   | <i>Dictyoglomia</i>                  | 2.06                   |
| <i>Cyanobacteria</i>         | 4.56                   | <i>Cyanobacteria</i>         | 5.85                   | <i>Alphaproteobacteria</i>   | 3.22                   | <i>Atribacteria Incertae Sedis</i>   | 1.92                   |
| <i>Gammaproteobacteria</i>   | 4.39                   | <i>Gammaproteobacteria</i>   | 5.53                   | <i>Chlorobia</i>             | 3.09                   | <i>Fimbriimonadia</i>                | 1.84                   |
| <i>Bacilli</i>               | 3.01                   | <i>Bacilli</i>               | 3.88                   | <i>Sphingobacteriia</i>      | 3.02                   | <i>Chthonomonadetes</i>              | 1.75                   |
| <i>Anaerolineae</i>          | 2.94                   | <i>Anaerolineae</i>          | 3.72                   | <i>Planctomycetacia</i>      | 2.95                   | <i>Thermomicrobia</i>                | 1.75                   |
| <i>Thermodesulfobacteria</i> | 2.93                   | <i>Thermodesulfobacteria</i> | 3.58                   | <i>Nitrospira</i>            | 2.73                   | <i>Candidatus Roizmanbacteria</i>    | 1.73                   |
| <i>Thermotogae</i>           | 2.30                   | <i>Thermotogae</i>           | 2.66                   | <i>Betaproteobacteria</i>    | 2.68                   | <i>Caldilineae</i>                   | 1.73                   |
| <i>Thermoprotei</i>          | 1.73                   | <i>Thermoprotei</i>          | 2.07                   | <i>Thermoprotei</i>          | 2.67                   | <i>Verrucomicrobiae</i>              | 1.70                   |
| <i>Clostridia</i>            | 1.61                   | <i>Clostridia</i>            | 1.98                   | <i>Aquificae</i>             | 2.63                   | <i>Thermoleophilia</i>               | 1.64                   |
| <i>Chlorobia</i>             | 1.48                   | <i>Chlorobia</i>             | 1.72                   | <i>Deltaproteobacteria</i>   | 2.27                   | <i>Methanobacteria</i>               | 1.63                   |
| <i>Alphaproteobacteria</i>   | 1.43                   | <i>Alphaproteobacteria</i>   | 1.63                   | <i>Spirochaetes</i>          | 2.24                   | <i>Candidatus Azambacteria</i>       | 1.50                   |
| <i>Deltaproteobacteria</i>   | 1.31                   | <i>Deltaproteobacteria</i>   | 1.56                   | <i>Cyanobacteria</i>         | 2.23                   | <i>Acidobacteria</i>                 | 1.24                   |
| <i>Nitrospira</i>            | 1.27                   | <i>Nitrospira</i>            | 1.46                   | <i>Anaerolineae</i>          | 2.08                   | <i>Spartobacteria</i>                | 1.21                   |
| <i>Ignavibacteria</i>        | 1.06                   | <i>Ignavibacteria</i>        | 1.13                   | <i>Cytophagia</i>            | 1.93                   | <i>Chlamydiae</i>                    | 1.15                   |
| Others                       | 30.85                  | Others                       | 12.68                  | <i>Clostridia</i>            | 1.93                   | <i>Candidatus Woesebacteria</i>      | 1.06                   |
|                              |                        |                              |                        | <i>Phycisphaerae</i>         | 1.76                   | <i>Thaumarchaeota Incertae Sedis</i> | 1.05                   |
|                              |                        |                              |                        | Others                       | 43.62                  | Others                               | 66.30                  |

Table S4. Affiliation of the identified phyla from the obtained 16S rRNA gene sequence reads of the total biosphere in the moderate- and high-temperature hot springs

| Phyla identified in the moderate-T hot springs | Relative abundance (%) | Phyla identified in the high-T hot springs | Relative abundance (%) |
|------------------------------------------------|------------------------|--------------------------------------------|------------------------|
| <i>Chloroflexi</i>                             | 26.96                  | <i>Aquificae</i>                           | 20.74                  |
| <i>Bacteroidetes</i>                           | 18.03                  | <i>Proteobacteria</i>                      | 16.56                  |
| <i>Proteobacteria</i>                          | 13.76                  | <i>Bacteroidetes</i>                       | 14.98                  |
| <i>Aquificae</i>                               | 8.63                   | <i>Deinococcus-Thermus</i>                 | 14.32                  |
| <i>Cyanobacteria</i>                           | 8.21                   | <i>Firmicutes</i>                          | 13.69                  |
| <i>Bathyarchaeota</i>                          | 8.19                   | <i>Chloroflexi</i>                         | 12.36                  |
| <i>Deinococcus-Thermus</i>                     | 8.16                   | <i>Thermotogae</i>                         | 11.84                  |
| <i>Acetothermia</i>                            | 7.52                   | <i>Thermodesulfobacteria</i>               | 9.47                   |
| <i>Fervidibacteria</i>                         | 6.76                   | <i>Acetothermia</i>                        | 9.47                   |
| <i>Euryarchaeota</i>                           | 6.58                   | <i>Dictyoglomi</i>                         | 9.44                   |
| <i>Thermodesulfobacteria</i>                   | 4.70                   | <i>Bathyarchaeota</i>                      | 8.01                   |
| <i>Woesearchaeota</i> (DHVEG-6)                | 4.57                   | <i>Cyanobacteria</i>                       | 7.18                   |
| <i>Altiarchaeales</i>                          | 4.35                   | <i>Parcubacteria</i>                       | 6.86                   |
| <i>Chlorobi</i>                                | 4.14                   | <i>Crenarchaeota</i>                       | 5.83                   |
| <i>Armatimonadetes</i>                         | 3.75                   | <i>Chlorobi</i>                            | 5.22                   |
| <i>Nitrospirae</i>                             | 3.59                   | <i>Fervidibacteria</i>                     | 5.16                   |
| <i>Crenarchaeota</i>                           | 3.51                   | <i>Spirochaetae</i>                        | 4.71                   |
| <i>Deferribacteres</i>                         | 3.49                   | <i>Ignavibacteriae</i>                     | 4.03                   |
| <i>Thaumarchaeota</i>                          | 3.34                   | <i>Woesearchaeota</i> (DHVEG-6)            | 3.75                   |
| <i>Firmicutes</i>                              | 3.26                   | <i>Atribacteria</i>                        | 3.23                   |
| <i>Spirochaetae</i>                            | 2.98                   | <i>Planctomycetes</i>                      | 3.04                   |
| <i>Verrucomicrobia</i>                         | 2.88                   | <i>Euryarchaeota</i>                       | 2.98                   |
| <i>Acidobacteria</i>                           | 2.83                   | <i>Thaumarchaeota</i>                      | 2.94                   |
| <i>Planctomycetes</i>                          | 2.79                   | <i>Verrucomicrobia</i>                     | 2.81                   |
| <i>Thermotogae</i>                             | 2.76                   | <i>Acidobacteria</i>                       | 2.50                   |
| <i>Microgenomates</i>                          | 2.41                   | <i>Actinobacteria</i>                      | 1.78                   |
| <i>Ignavibacteriae</i>                         | 2.40                   | <i>Aigarchaeota</i>                        | 1.71                   |
| <i>Parcubacteria</i>                           | 2.17                   | <i>Nitrospirae</i>                         | 1.55                   |
| <i>Caldiserica</i>                             | 1.42                   | <i>Calescamantes</i>                       | 1.40                   |
| <i>Aigarchaeota</i>                            | 1.23                   | Others                                     | 8.54                   |
| <i>Gracilibacteria</i>                         | 1.22                   |                                            |                        |
| <i>Aminicenantes</i>                           | 1.05                   |                                            |                        |
| Others                                         | 14.37                  |                                            |                        |

Table S5. Affiliation of the identified phyla from the obtained 16S rRNA gene sequence reads of the abundant biosphere in the moderate and high-temperature hot springs

| Phyla identified in the moderate-T hot springs | Relative abundance (%) | Phyla identified in the high-T hot springs | Relative abundance (%) |
|------------------------------------------------|------------------------|--------------------------------------------|------------------------|
| <i>Chloroflexi</i>                             | 16.54                  | <i>Aquificae</i>                           | 5.74                   |
| <i>Proteobacteria</i>                          | 8.14                   | <i>Proteobacteria</i>                      | 5.51                   |
| <i>Deinococcus-Thermus</i>                     | 6.03                   | <i>Deinococcus-Thermus</i>                 | 4.73                   |
| <i>Bacteroidetes</i>                           | 5.66                   | <i>Firmicutes</i>                          | 3.68                   |
| <i>Cyanobacteria</i>                           | 4.27                   | <i>Bacteroidetes</i>                       | 3.29                   |
| <i>Aquificae</i>                               | 3.14                   | <i>Chloroflexi</i>                         | 1.92                   |
| <i>Acetothermia</i>                            | 2.58                   | <i>Thermotogae</i>                         | 1.70                   |
| <i>Thermodesulfobacteria</i>                   | 1.43                   | <i>Acetothermia</i>                        | 1.54                   |
| <i>Bathyarchaeota</i>                          | 1.21                   | <i>Thermodesulfobacteria</i>               | 1.42                   |
| <i>Nitrospirae</i>                             | 1.14                   | <i>Crenarchaeota</i>                       | 1.11                   |
| <i>Firmicutes</i>                              | 1.10                   | <i>Fervidibacteria</i>                     | 0.85                   |
| <i>Chlorobi</i>                                | 1.08                   | <i>Cyanobacteria</i>                       | 0.57                   |
| <i>Acidobacteria</i>                           | 0.79                   | <i>Euryarchaeota</i>                       | 0.55                   |
| <i>Thaumarchaeota</i>                          | 0.78                   | <i>Parcubacteria</i>                       | 0.50                   |
| <i>Parcubacteria</i>                           | 0.78                   | Others                                     | 1.99                   |
| <i>Woesearchaeota</i> (DHVEG-6)                | 0.71                   |                                            |                        |
| <i>Ignavibacteriae</i>                         | 0.61                   |                                            |                        |
| <i>Armatimonadetes</i>                         | 0.55                   |                                            |                        |
| <i>Crenarchaeota</i>                           | 0.54                   |                                            |                        |
| <i>Planctomycetes</i>                          | 0.47                   |                                            |                        |
| <i>Thermotogae</i>                             | 0.45                   |                                            |                        |
| Others                                         | 1.92                   |                                            |                        |

Table S6. Affiliation of the identified phyla from the obtained 16S rRNA gene sequence reads of the intermediate biosphere in the moderate and high-temperature hot springs

| Phyla identified in the moderate-T hot springs | Relative abundance (%) | Phyla identified in the high-T hot springs | Relative abundance (%) |
|------------------------------------------------|------------------------|--------------------------------------------|------------------------|
| <i>Thermotogae</i>                             | 6.14                   | <i>Thermotogae</i>                         | 4.56                   |
| <i>Armatimonadetes</i>                         | 5.01                   | <i>Thermodesulfobacteria</i>               | 4.12                   |
| <i>Ignavibacteriae</i>                         | 4.99                   | <i>Chloroflexi</i>                         | 3.73                   |
| <i>Bacteroidetes</i>                           | 4.81                   | <i>Acetothermia</i>                        | 3.65                   |
| <i>Verrucomicrobia</i>                         | 4.72                   | <i>Bacteroidetes</i>                       | 3.63                   |
| <i>Planctomycetes</i>                          | 4.65                   | <i>Armatimonadetes</i>                     | 3.50                   |
| <i>Chlorobi</i>                                | 4.61                   | <i>Thaumarchaeota</i>                      | 3.39                   |
| <i>Thermodesulfobacteria</i>                   | 4.57                   | <i>Fervidibacteria</i>                     | 3.34                   |
| <i>Acidobacteria</i>                           | 4.12                   | <i>Crenarchaeota</i>                       | 3.19                   |
| <i>Aquificae</i>                               | 3.90                   | <i>Cyanobacteria</i>                       | 2.98                   |
| <i>Acetothermia</i>                            | 3.89                   | <i>Parcubacteria</i>                       | 2.83                   |
| <i>Spirochaetae</i>                            | 3.55                   | <i>Nitrospirae</i>                         | 2.82                   |
| <i>Nitrospirae</i>                             | 3.44                   | <i>Bathyarchaeota</i>                      | 2.79                   |
| <i>Parcubacteria</i>                           | 3.28                   | <i>Ignavibacteriae</i>                     | 2.49                   |
| <i>Crenarchaeota</i>                           | 3.14                   | <i>Dictyoglomi</i>                         | 2.16                   |
| <i>Firmicutes</i>                              | 2.98                   | <i>Acidobacteria</i>                       | 1.83                   |
| <i>Fervidibacteria</i>                         | 2.90                   | <i>Chlorobi</i>                            | 1.83                   |
| <i>Euryarchaeota</i>                           | 2.87                   | <i>Atribacteria</i>                        | 1.61                   |
| <i>Cyanobacteria</i>                           | 2.57                   | <i>Aquificae</i>                           | 1.61                   |
| <i>Aigarchaeota</i>                            | 2.09                   | <i>Firmicutes</i>                          | 1.54                   |
| <i>Caldiserica</i>                             | 1.98                   | <i>Planctomycetes</i>                      | 1.52                   |
| <i>Thaumarchaeota</i>                          | 1.96                   | <i>Actinobacteria</i>                      | 1.43                   |
| <i>Woesearchaeota (DHVEG-6)</i>                | 1.78                   | <i>Proteobacteria</i>                      | 1.36                   |
| <i>Aminicenantes</i>                           | 1.71                   | <i>Aigarchaeota</i>                        | 1.27                   |
| <i>Omnitrophica</i>                            | 1.69                   | <i>Verrucomicrobia</i>                     | 1.23                   |
| <i>Microgenomates</i>                          | 1.65                   | Others                                     | 13.49                  |
| <i>Bathyarchaeota</i>                          | 1.59                   |                                            |                        |
| <i>Actinobacteria</i>                          | 1.57                   |                                            |                        |
| <i>Altiarchaeales</i>                          | 1.24                   |                                            |                        |
| <i>Deferribacteres</i>                         | 1.14                   |                                            |                        |
| Others                                         | 17.72                  |                                            |                        |



Table S7. Affiliation of the identified phyla from the obtained 16S rRNA gene sequence reads of the rare biosphere in the moderate- and high-temperature hot springs

| Phyla identified in the moderate-T hot springs | Relative abundance (%) | Phyla identified in the high-T hot springs | Relative abundance (%) |
|------------------------------------------------|------------------------|--------------------------------------------|------------------------|
| <i>Atribacteria</i>                            | 3.24                   | <i>Aminicenantes</i>                       | 1.60                   |
| <i>Hadesarchaea</i>                            | 3.11                   | <i>Hydrogenedentes</i>                     | 1.37                   |
| <i>Dictyoglomi</i>                             | 3.00                   | <i>Dictyoglomi</i>                         | 1.33                   |
| <i>Calescamantes</i>                           | 2.96                   | <i>Microgenomates</i>                      | 1.31                   |
| <i>Hydrogenedentes</i>                         | 2.83                   | <i>Caldiserica</i>                         | 1.28                   |
| <i>Microgenomates</i>                          | 2.24                   | <i>Bathyarchaeota</i>                      | 1.12                   |
| <i>Aminicenantes</i>                           | 2.13                   | <i>Verrucomicrobia</i>                     | 0.93                   |
| <i>Chlamydiae</i>                              | 1.99                   | <i>Hadesarchaea</i>                        | 0.91                   |
| <i>Crenarchaeota</i>                           | 1.94                   | <i>Planctomycetes</i>                      | 0.90                   |
| <i>Fervidibacteria</i>                         | 1.75                   | <i>Actinobacteria</i>                      | 0.90                   |
| <i>Omnitrophica</i>                            | 1.74                   | <i>Omnitrophica</i>                        | 0.83                   |
| <i>Altiarchaeales</i>                          | 1.69                   | <i>Tenericutes</i>                         | 0.83                   |
| <i>Lentisphaerae</i>                           | 1.29                   | <i>Atribacteria</i>                        | 0.81                   |
| <i>Woesearchaeota (DHVEG-6)</i>                | 1.20                   | <i>Woesearchaeota (DHVEG-6)</i>            | 0.78                   |
| <i>Lokiarchaeota</i>                           | 0.97                   | <i>Acidobacteria</i>                       | 0.76                   |
| <i>Fibrobacteres</i>                           | 0.95                   | <i>Altiarchaeales</i>                      | 0.76                   |
| <i>Korarchaeota</i>                            | 0.83                   | <i>Spirochaetae</i>                        | 0.71                   |
| <i>Tenericutes</i>                             | 0.82                   | <i>Armatimonadetes</i>                     | 0.70                   |
| <i>Actinobacteria</i>                          | 0.76                   | <i>Chlorobi</i>                            | 0.68                   |
| <i>Aenigmarchaeota</i>                         | 0.70                   | <i>Korarchaeota</i>                        | 0.62                   |
| <i>Gracilibacteria</i>                         | 0.69                   | <i>Ignavibacteriae</i>                     | 0.60                   |
| <i>Parcubacteria</i>                           | 0.63                   | <i>Thaumarchaeota</i>                      | 0.59                   |
| <i>Verrucomicrobia</i>                         | 0.62                   | <i>Calescamantes</i>                       | 0.55                   |
| <i>Poribacteria</i>                            | 0.62                   | Others                                     | 11.21                  |
| <i>Elusimicrobia</i>                           | 0.61                   |                                            |                        |
| <i>Aigarchaeota</i>                            | 0.60                   |                                            |                        |
| <i>Bathyarchaeota</i>                          | 0.58                   |                                            |                        |
| Others                                         | 27.42                  |                                            |                        |

Table S8 Identified potential microbial ecological functions and their relative abundance of in the total, abundant, intermediate and rare biosphere of the studied hot springs

| Microbial ecological functions  | Relative abundance of microbial ecological functions in average (%) |          |              |       |
|---------------------------------|---------------------------------------------------------------------|----------|--------------|-------|
|                                 | Total                                                               | Abundant | Intermediate | Rare  |
| Number of identified functions  | 22                                                                  | 15       | 21           | 20    |
| photoautotrophy                 | 6.48                                                                | 5.43     | 2.55         | 3.85  |
| photoheterotrophy               | 0.02                                                                | 0.00     | 0.11         | 0.14  |
| chemoheterotrophy               | 7.06                                                                | 26.27    | 3.99         | 13.25 |
| anoxygenic photoautotrophy      | 0.62                                                                | 0.20     | 0.52         | 0.53  |
| sulfur compounds respiration    | 5.05                                                                | 7.86     | 4.16         | 3.76  |
| dark sulfur compounds oxidation | 6.90                                                                | 7.36     | 0.74         | 0.70  |
| sulfate reduction               | 3.71                                                                | 3.04     | 2.72         | 1.55  |
| denitrification                 | 2.14                                                                | 6.97     | 1.30         | 2.11  |
| ammonia oxidation               | 1.27                                                                | 2.81     | 0.00         | 0.00  |
| nitrification                   | 1.27                                                                | 2.81     | 1.53         | 3.13  |
| nitrogen fixation               | 1.14                                                                | 4.43     | 0.98         | 0.74  |
| dark hydrogen oxidation         | 0.65                                                                | 1.37     | 0.63         | 0.78  |
| aromatic compound degradation   | 0.47                                                                | 0.00     | 0.30         | 0.42  |
| fermentation                    | 0.36                                                                | 1.73     | 0.78         | 0.64  |
| knallgas bacteria               | 0.36                                                                | 1.21     | 0.33         | 0.23  |
| methanogenesis                  | 0.29                                                                | 0.35     | 0.10         | 0.68  |
| xylan degradation               | 0.21                                                                | 0.00     | 0.30         | 0.22  |
| nitrite respiration             | 0.17                                                                | 0.00     | 0.15         | 0.00  |
| iron respiration                | 0.16                                                                | 0.22     | 0.17         | 0.29  |
| methylotrophy                   | 0.02                                                                | 0.00     | 0.04         | 0.44  |
| methanol oxidation              | 0.02                                                                | 0.00     | 0.04         | 0.23  |
| hydrocarbon degradation         | 0.02                                                                | 0.00     | 0.03         | 0.15  |
| others                          | 83.41                                                               | 75.17    | 78.54        | 83.41 |

Table S9 The relative abundance of the identified microbial ecological functions in the studied MT and HT hot springs for the total, abundant, intermediate and rare biospheres

| Microbial ecological functions  | Average relative abundance (%) of the identified microbial ecological functions |       |          |       |              |      |       |       |
|---------------------------------|---------------------------------------------------------------------------------|-------|----------|-------|--------------|------|-------|-------|
|                                 | Total                                                                           |       | Abundant |       | Intermediate |      | Rare  |       |
|                                 | MT                                                                              | HT    | MT       | HT    | MT           | HT   | MT    | HT    |
| photoautotrophy                 | 8.85                                                                            | 2.33  | 6.24     | 4.02  | 2.95         | 1.85 | 3.29  | 4.83  |
| photoheterotrophy               | 0.00                                                                            | 0.00  | 0.00     | 0.00  | 0.02         | 0.26 | 0.16  | 0.11  |
| chemoheterotrophy               | 4.95                                                                            | 10.75 | 18.15    | 40.48 | 2.38         | 6.82 | 11.82 | 15.76 |
| anoxygenic photoautotrophy      | 0.86                                                                            | 0.19  | 0.22     | 0.15  | 0.68         | 0.25 | 0.35  | 0.85  |
| sulfur compounds respiration    | 4.57                                                                            | 5.90  | 7.03     | 9.33  | 4.47         | 3.60 | 3.46  | 4.28  |
| dark sulfur compounds oxidation | 6.21                                                                            | 8.11  | 3.17     | 14.68 | 0.54         | 1.10 | 0.59  | 0.89  |
| sulfate reduction               | 3.46                                                                            | 4.15  | 2.60     | 3.81  | 2.97         | 2.29 | 1.50  | 1.65  |
| denitrification                 | 2.14                                                                            | 2.14  | 4.53     | 11.25 | 1.21         | 1.46 | 1.78  | 2.69  |
| ammonia oxidation               | 1.87                                                                            | 0.22  | 2.63     | 3.13  | 0.00         | 0.00 | 0.00  | 0.00  |
| nitrification                   | 1.87                                                                            | 0.21  | 2.63     | 3.13  | 2.01         | 0.70 | 3.05  | 3.28  |
| nitrogen fixation               | 1.20                                                                            | 1.03  | 4.70     | 3.95  | 1.01         | 0.92 | 0.60  | 0.97  |
| dark hydrogen oxidation         | 0.37                                                                            | 1.13  | 0.12     | 3.56  | 0.49         | 0.86 | 0.76  | 0.82  |
| aromatic compound degradation   | 0.33                                                                            | 0.71  | 0.00     | 0.00  | 0.21         | 0.45 | 0.22  | 0.77  |
| fermentation                    | 0.17                                                                            | 0.70  | 1.91     | 1.41  | 0.56         | 1.17 | 0.47  | 0.94  |
| knallgas bacteria               | 0.33                                                                            | 0.41  | 0.00     | 3.34  | 0.25         | 0.48 | 0.24  | 0.23  |
| methanogenesis                  | 0.24                                                                            | 0.38  | 0.17     | 0.67  | 0.15         | 0.02 | 0.69  | 0.67  |
| xylan degradation               | 0.10                                                                            | 0.41  | 0.00     | 0.00  | 0.08         | 0.68 | 0.30  | 0.07  |
| nitrite respiration             | 0.11                                                                            | 0.28  | 0.00     | 0.00  | 0.09         | 0.25 | 0.00  | 0.00  |
| iron respiration                | 0.12                                                                            | 0.24  | 0.30     | 0.08  | 0.15         | 0.19 | 0.20  | 0.45  |
| methyloctrophy                  | 0.00                                                                            | 0.05  | 0.00     | 0.00  | 0.03         | 0.06 | 0.20  | 0.86  |
| methanol oxidation              | 0.00                                                                            | 0.05  | 0.00     | 0.00  | 0.02         | 0.06 | 0.10  | 0.44  |
| hydrocarbon degradation         | 0.00                                                                            | 0.05  | 0.00     | 0.00  | 0.03         | 0.03 | 0.05  | 0.30  |

Fig. S1 Ecological characters of the sampled Tibetan hot springs in QZM (A, B, C, D), DGJ (E, F, G, H, I), QC (J), SM (K) and GD (L) zones.

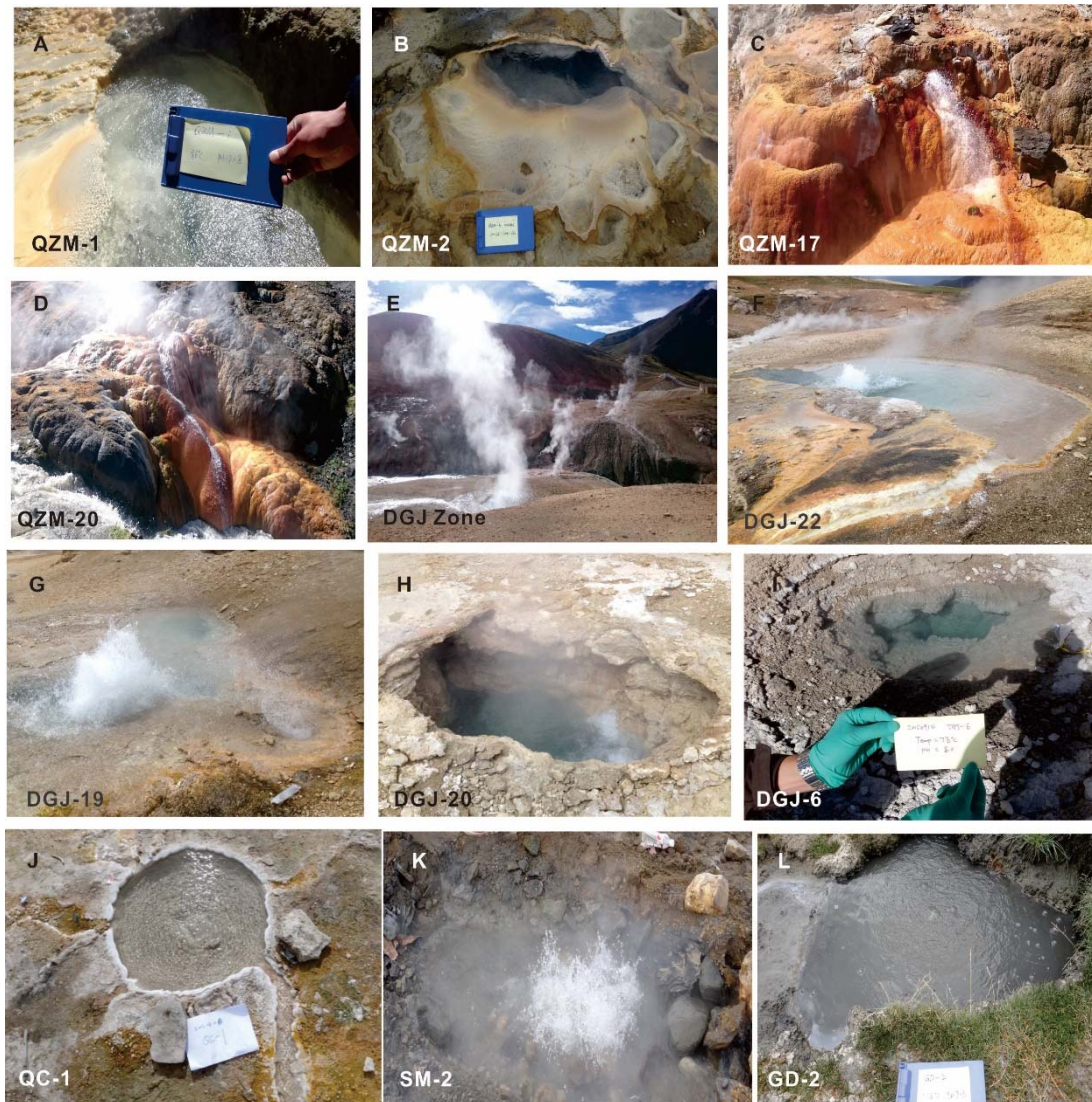

Fig. S2 Geochemistry clustering of the studied hot springs based on Euclidean distance of the measured environmental factors.

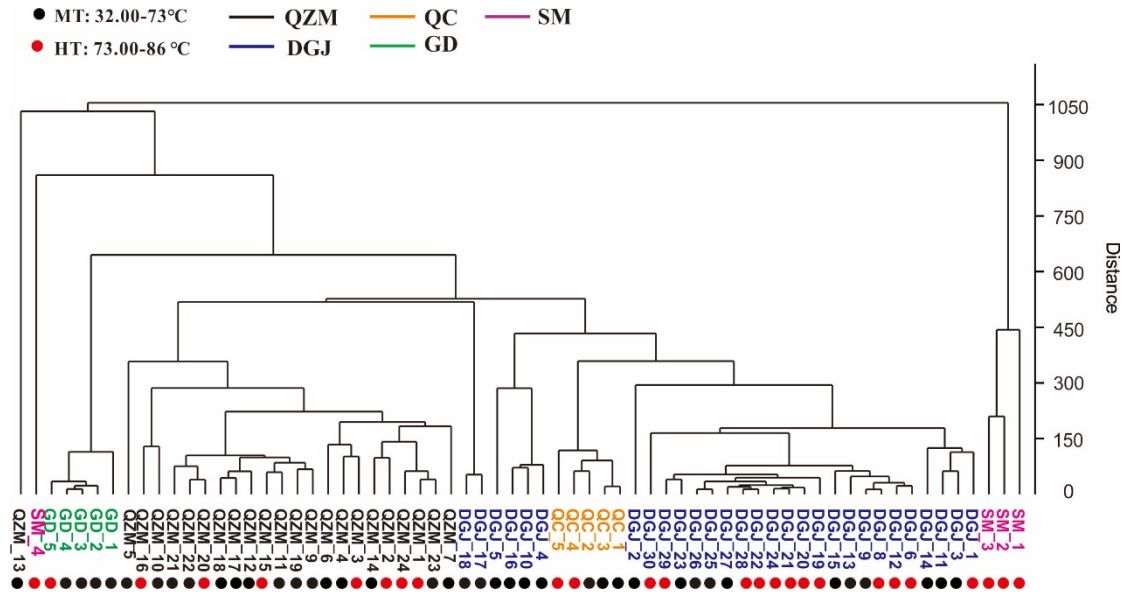

Fig. S3 UPGMA cluster dendrograms based on Bray-Curtis dissimilarities (at the 97% cutoff) of 16S rRNA gene fragments obtained in this study. A, B, C and D panels were for total, abundant (relative abundance > 1%), intermediate (relative abundance 0.01-1%) and rare (relative abundance < 0.01%) OTUs, respectively.

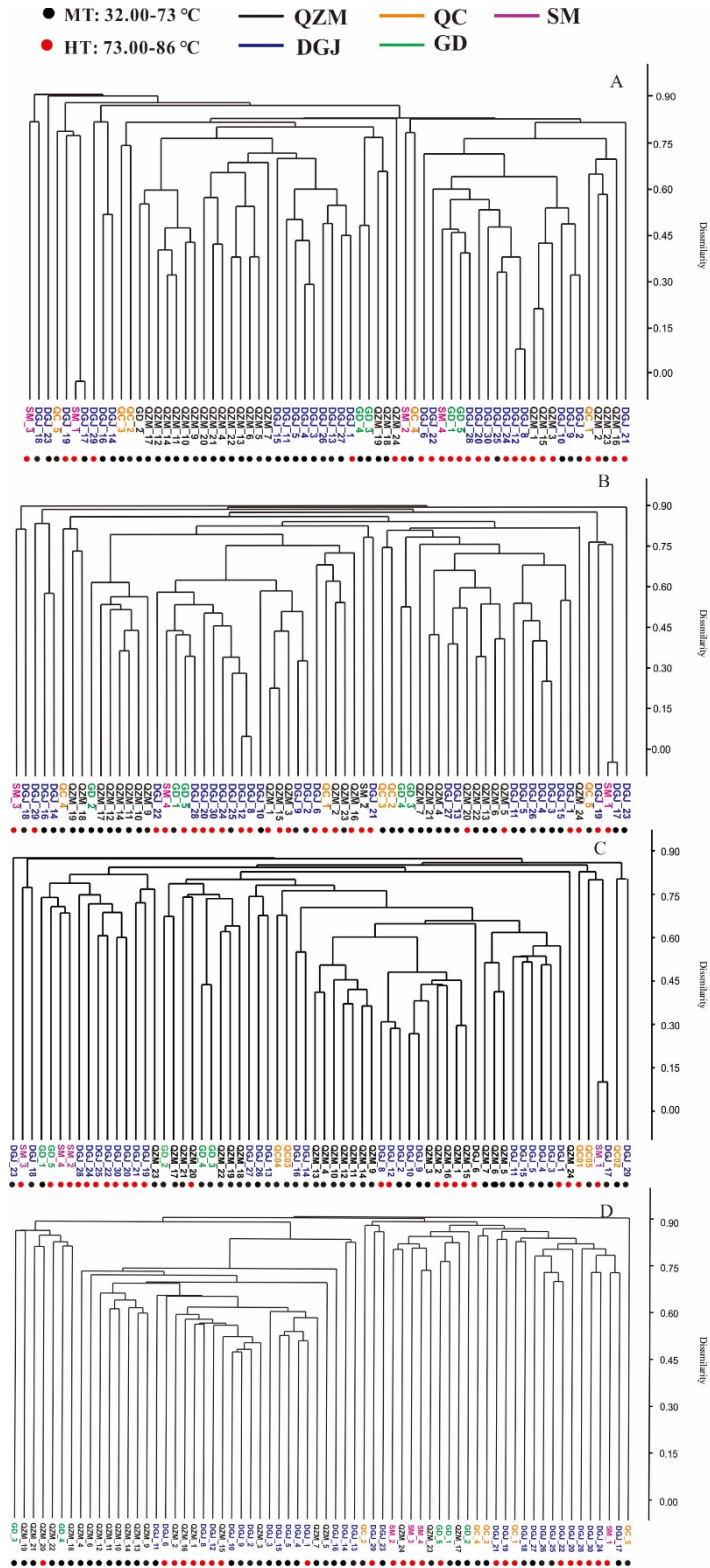

Supplement: Data_Sheet_1.pdf [file Data_Sheet_1.pdf]
